# Supplementary material for: Conservation of avian diet specialists: lessons from brood provisioning ecology of the endangered vermivore, the Fairy Pitta (Pitta nympha)
Source: Research Square preprint supplement (doi:10.21203/rs.3.rs-1524024/v1), 2022-04-07
Supplement: Supplementary file 1 [file 9f2e6d813deff6c30d65ea7f.xlsx]

## Sheet: Earthworm densities
number	breeding range or non-breeding range	location	habitat	location within habitat	if used or potentially used by Pitta for foraging (1 = natural rain/broadleaved forest/2 = plantation/managed forest/secondary forest: potentially used; because vegetation cover exists providing safety during foraging)	method	method(cm)	habitat type	total_number(nr/m^2)	epigeic nr/m^2	total_biomass(mg/m^2)	total_biomass(g/m^2)	units in paper	paper	months/season when data were collected
1	breeding range	Japan, Simanto	evergreen broad-leaved forest, ridge	Table 5, EBF, ridge, v	1	A0 layer only	0	BTNA0	0.53		200	0.2	g per m^2	Minamiya et al., 2007	August
2	breeding range	Japan, Simanto	evergreen broad-leaved forest, middle	Table 5, EBF, middle, v	1	A0 layer only	0	BTNA0	1.09		830	0.83	g per m^2	Minamiya et al., 2007	August
3	breeding range	Japan, Simanto	evergreen broad-leaved forest, middle	Table 5, EBF, middle, c	1	A0 layer only	0	BTNA0	1.04		1060	1.06	g per m^2	Minamiya et al., 2007	August
4	breeding range	Japan, Simanto	evergreen broad-leaved forest, ravine (=bottom)	Table 5, EBF, bottom c	1	A0 layer only	0	BTNA0	3.39		2940	2.94	g per m^2	Minamiya et al., 2007	August
5	breeding range	Japan, Simanto	Japanese cedar plantation, middle	Table 5, JCP, middle c	1	A0 layer only	0	BTNA0	1.62		960	0.96	g per m^2	Minamiya et al., 2007	August
6	breeding range	Japan, Simanto	Japanese cedar plantation, ravine (~=bottom)	Table 5, JCP, ravine, c	1	A0 layer only	0	BTNA0	1.8		690	0.69	g per m^2	Minamiya et al., 2007	August
7	breeding range	Japan, Simanto	hinoki cypress plantation, ridge	Table 5, HCP, ridge, v	1	A0 layer only	0	BTNA0	1.33		670	0.67	g per m^2	Minamiya et al., 2007	August
8	breeding range	Japan, Simanto	hinoki cypress plantation, middle (~=bottom)	Table 5, HCP, middle , v	1	A0 layer only	0	BTNA0	0.82		360	0.36	g per m^2	Minamiya et al., 2007	August
9	breeding range	Japan, Simanto	hinoki cypress plantation, middle (~=bottom)	Table 5, HCP, middle, c	1	A0 layer only	0	BTNA0	1.25		690	0.69	g per m^2	Minamiya et al., 2007	August
10	breeding range	Korea, Jeju	broad-leaved forest, valley (Gotjawal)	Table 1	1	A0 layer only <= 5cm deep	0	BTNA0	6.3					Kim et al., 2014	July
11	breeding range	Korea, Jeju	broad-leaved forest, valley (around Gotjawal valley)	Table 1	1	A0 layer only <= 5cm deep	0	BTNA0	1.8					Kim et al., 2014	July
12	breeding range	Korea, Jeju	broad-leaved forest	Table 1	1	A0 layer only <= 5cm deep	0	BTNA0	4.14					Kim at al., 2010	April to November
13	breeding range	Korea, Hanpyeong-gun	broad-leaved forest	Table 7	1	A0 layer only <= 5cm deep	0	BTNA0	8.67					Kim at al., 2010	April to November
14	breeding range	Japan, Kyoto	mixed deciduous broad-leaved forest, ridge of ravine	Table 3 1976, Ashiu Experimental Forest of Kyoto University,	1	10cm deep	10	BTN	38		3961	3.961	mg per m^2	Tsukamoto, 1996	May to November
15	breeding range	Japan, Kyoto	mixed deciduous broad-leaved forest, ridge of ravine	Table 3 1977, Ashiu Experimental Forest of Kyoto University,	1	10cm deep	10	BTN	29		8416	8.416	mg per m^2	Tsukamoto, 1996	May to November
16	breeding range	Japan, Kyoto	mixed deciduous broad-leaved forest, bottom of ravine	Table 3 1976, Ashiu Experimental Forest of Kyoto University,	1	10cm deep	10	BTN	76		6144	6.144	mg per m^2	Tsukamoto, 1996	May to November
17	breeding range	Japan, Kyoto	mixed deciduous broad-leaved forest, bottom of ravine	Table 3 1977, Ashiu Experimental Forest of Kyoto University,	1	10cm deep	10	BTN	29		5616	5.616	mg per m^2	Tsukamoto, 1996	May to November
18	breeding range	N. China, Bohai Bay at or beyond northern breeidng range of pitta	Chinese ash forest	reading from Fig. 1 approximate values	1	30cm deep	30	BTN	25					Tao et al., 2013	October
19	breeding range	Japan, Kyoto	mixed deciduous broad-leaved forest, ridge of ravine	Table 3 1974 (1978), Ashiu Experimental Forest of Kyoto University,	1	40cm deep	40	BTN	51		7518	7.518	mg per m^2	Tsukamoto, 1996	May to November
20	breeding range	Japan, Kyoto	mixed deciduous broad-leaved forest, bottom of ravine	Table 3 1975 (1978), Ashiu Experimental Forest of Kyoto University,	1	40cm deep	40	BTN	74		12653	12.653	mg per m^2	Tsukamoto, 1996	May to November
21	breeding range	E. China, Daqiao and Yuanqiao both of Qianjiang Municipality (Hubei Province)	small woodlot = managed forest	Y16	2	20cm deep	20	BM	3.01		2700	2.7	g per m^2	Fang et al., 1999	July to January
22	breeding range	E. China, Daqiao and Yuanqiao both of Qianjiang Municipality (Hubei Province)	hedges in agricultureal landscape	D19	2	20cm deep	20	BM	30.49		29300	29.3	g per m^2	Fang et al., 1999	July to January
23	breeding range	E. China, Daqiao and Yuanqiao both of Qianjiang Municipality (Hubei Province)	hedges in agricultureal landscape	D20	2	20cm deep	20	BM	49.43		66540	66.54	g per m^2	Fang et al., 1999	July to January
24	breeding range	N. China, Bohai Bay at or beyond northern breeidng range of pitta	Pear Orchard	reading from Fig. 1 approximate values	2	30cm deep	30	BM	125					Tao et al., 2013	October
25	breeding range	E. China, Songjiang District, Shanghai, 32 km southwest of the city center (30°58′N, 121°16′E)	managed evergreen forest/tree stand; pure E. Elaeocarpus	Fig. 3 adding means for three species	2	40cm deep	40	BM	30					Wang et al., 2011	April
26	breeding range	E. China, Songjiang District, Shanghai, 32 km southwest of the city center (30°58′N, 121°16′E)	managed evergreen mixed forest: C. camphora, E. sylvestris, K. paniculata, and L. lucidum	Fig. 3 adding means for three species	2	40cm deep	40	BM	31					Wang et al., 2011	April
27	breeding range(near)	Vietnam, North Part, near Hanoi, - inlcuded as "Breeding range" because it is not that far from the chinese place with nests descriped in the diet paper.	young fallow Ph. leucocirca, tree regrowth	EUCA; estimated by measuring for each sample in figure 1 and recalculating.	2	50cm deep	50	BM	12.9					Jounquet et al., 2007	August
28	breeding range(near)	Vietnam, North Part, near Hanoi, - inlcuded as "Breeding range" because it is not that far from the chinese place with nests descriped in the diet paper.	mixed Acaica mangium and Venicia montanta; acacia tree and mu oil tree plantation	FOR; estimated by measuring for each sample in figure 1 and recalculating.	2	50cm deep	50	BM	9					Jounquet et al., 2007	August
29	non-breeding range	Malaysia, Sarawak, Gunung Mulu National Park	lowland tropical forest	Alluvial forest (AF); lowest parts flooded periodically	1	10cm deep	10	NBTN	42		1003	1.003	mg wet mass per m^2	Anderson et al., 1983	Unavailable.
30	non-breeding range	Malaysia, Sarawak, Gunung Mulu National Park	lowland tropical forest	Dipterocarp forest (DF); along spur on lower slopes of mt mulu, slopes of 15-20 degree	1	10cm deep	10	NBTN	26		645	0.645	mg wet mass per m^2	Anderson et al., 1983	Unavailable.
31	non-breeding range	Malaysia, Sarawak, Gunung Mulu National Park	lowland tropical forest	Heath forest (HF); on terrace of sany deposits	1	10cm deep	10	NBTN	24		389	0.389	mg wet mass per m^2	Anderson et al., 1983	Unavailable.
32	non-breeding range	Malaysia, Sarawak, Gunung Mulu National Park	lowland tropical forest	Limestone forest (LF); lower slopes of Mt Api, uneven surface with expxosed rocks forming 9% areas, sloppe 30deg	1	10cm deep	10	NBTN	6		610	0.61	mg wet mass per m^2	Anderson et al., 1983	Unavailable.
33	non-breeding range	E. Malayisa, Gunung Sila, Sabah (mountain)	lowland rain forest; 280m, Dipterocarp forest	plot 6B,	1	15cm deep	15	NBTN	6		1.8	0.0018	mg per m^2	Leakey and Proctor, 1987	June to September
34	non-breeding range	E. Malayisa, Gunung Sila, Sabah (mountain)	lowland rain forest; 350m, Dipterocarp forest	plot 9A	1	15cm deep	15	NBTN	16		1907	1.907	mg per m^2	Leakey and Proctor, 1987	June to September
35	non-breeding range	E. Malayisa, Gunung Sila, Sabah (mountain)	lowland rain forest; 480m, Dipterocarp forest	plot 12B	1	15cm deep	15	NBTN	24		793	0.793	mg per m^2	Leakey and Proctor, 1987	June to September
36	non-breeding range	E. Malayisa, Gunung Sila, Sabah (mountain)	intermediae, Dipterocarp/Myrtaceous rain forest, 610m	plot 15A	1	15cm deep	15	NBTN	10		51.6	0.0516	mg per m^2	Leakey and Proctor, 1987	June to September
37	non-breeding range	E. Malayisa, Gunung Sila, Sabah (mountain)	Myrtaceous lower montane forest, 790m	plot 18B	1	15cm deep	15	NBTN	10		1.2	0.0012	mg per m^2	Leakey and Proctor, 1987	June to September
38	non-breeding range	E. Malayisa, Gunung Sila, Sabah (mountain)	Myrtaceous lower montane forest, 870m	plot 19A	1	15cm deep	15	NBTN	14		1.1	0.0011	mg per m^2	Leakey and Proctor, 1987	June to September
39	non-breeding range	Malaysia, Pasoh Forest Preserve	undisturbed dense tropical lowald rainforest of Shorea-Dipterocarpus type, with annully 2000mm rain	plot 1	1	20cm deep	20	NBTN	25.47		176.4	0.1764	mg wet mass per m^2	Kondoh et al., 1980	April to August
40	non-breeding range	Thailand, Sakaerat Station	dry evegreen forest	Table 3, DE	1	30cm deep	30	NBTN	47.2					Somniyam and Suwanwaree, 2009	June
41	non-breeding range	Thailand, Sakaerat Station	dry dipterocarp forest-fired	Table 3, DIF	1	30cm deep	30	NBTN	16.7					Somniyam and Suwanwaree, 2009	June
42	non-breeding range	Thailand, Sakaerat Station	dry dipterocarp forest-nonfired	Table 3, DINF	1	30cm deep	30	NBTN	8.3					Somniyam and Suwanwaree, 2009	June
43	non-breeding range	Thailand, Khao Yai National Park	mix deciduous forest	MD	1	30cm deep	30	NBTN	6.65					Kosavititkul, 2005	June to December
44	non-breeding range	Thailand, Khao Yai National Park	dry evergreen forest	DE	1	30cm deep	30	NBTN	11.93					Kosavititkul, 2005	June to December
45	non-breeding range	Thailand, Khao Yai National Park	moist evergreen forest	ME	1	30cm deep	30	NBTN	93.23					Kosavititkul, 2005	June to December
46	non-breeding range	Thailand, Khao Yai National Park	hill evegreen forest	HE	1	30cm deep	30	NBTN	48.91					Kosavititkul, 2005	June to December
47	non-breeding range	Borneo, Sepilok	lowland rainforest	no details, no access to original paper	1	no details, no access to original paper		NBTN	3		2570	2.57	mg per m^2	Kitazawa 1971 cited in Fagoso and Lavelle, 1992	Unavailable.
58	non-breeding range	Indonesia, West Lampung, Sumberjaya	remnant (secondary) forest	Table 5	1	30cm deep; 0-10, 10-20. 20-30cm	30	NBTN	75	5	31000	31	g per m^2	Hairiah et al., 2006	November 2001 to August 2003, details are unavailable.
48	non-breeding range	Indonesia, West Java, Moutn Gede	managed (secondary) forest	Table 2, B1, Bogodol	2	30cm deep	30	NBM	27.6					Darmawan et al., 2017	July to December
49	non-breeding range	Indonesia, West Java, Moutn Gede	managed (secondary) forest	Table 2, B2, Bogodol	2	30cm deep	30	NBM	111.1					Darmawan et al., 2017	July to December
50	non-breeding range	Indonesia, West Java, Moutn Gede	managed (secondary) forest	Table 2, B3, Bogodol	2	30cm deep	30	NBM	13.8					Darmawan et al., 2017	July to December
51	non-breeding range	Indonesia, West Java, Moutn Gede	mixed plantation with bushes, vegetation cover	Table 2, B4, Bogodol	2	30cm deep	30	NBM	146.22					Darmawan et al., 2017	July to December
52	non-breeding range	Indonesia, West Java, Moutn Gede	mixed plantation with bushes, vegetation cover	Table 2, B5, Bogodol	2	30cm deep	30	NBM	138.67					Darmawan et al., 2017	July to December
53	non-breeding range	Indonesia, West Java, Moutn Gede	homogenous plantation with bushes, vegetation cover	Table 2, B6, Bogodol	2	30cm deep	30	NBM	80					Darmawan et al., 2017	July to December
54	non-breeding range	Indonesia, West Java, Moutn Gede	homogenous plantation with bushes, vegetation cover	Table 2, B7, Bogodol	2	30cm deep	30	NBM	101.59					Darmawan et al., 2017	July to December
55	non-breeding range	Indonesia, West Java, Moutn Gede	managed (secondary) forest	Table 3, S1, Situ Gunung	2	30cm deep	30	NBM	60.4					Darmawan et al., 2017	July to December
56	non-breeding range	Indonesia, West Java, Moutn Gede	managed (secondary) forest	Table 3, S2, Situ Gunung	2	30cm deep	30	NBM	66.2					Darmawan et al., 2017	July to December
57	non-breeding range	Indonesia, West Java, Moutn Gede	managed (secondary) forest	Table 3, S3, Situ Gunung	2	30cm deep	30	NBM	53.8					Darmawan et al., 2017	July to December
59	non-breeding range	Indonesia, West Lampung, Sumberjaya	multistrata coffee plantation	Table 5	2	30cm deep; 0-10, 10-20. 20-30cm	30	NBM	149	14	18000	18	g per m^2	Hairiah et al., 2006	November 2001 to August 2003, details are unavailable.
60	non-breeding range	Indonesia, West Lampung, Sumberjaya	simple shade coffee plantation	Table 5	2	30cm deep; 0-10, 10-20. 20-30cm	30	NBM	83	7	7000	7	g per m^2	Hairiah et al., 2006	November 2001 to August 2003, details are unavailable.
61	non-breeding range	Thailand, Sakaerat Station	Forest Plantation	Table 3, PL	2	30cm deep	30	NBM	111.1					Somniyam and Suwanwaree, 2009	June
62	non-breeding range	Inida, West Tripura, Sadar	Bamboo plantation; Bambusa cacharensis	BC	2	40cm deep	40	NBM	73.82		31260	31.26	g per m^2	Chaudhuri and Chakraboty, 2019	May 2013 to September 2015, details are unavailable.
63	non-breeding range	Inida, West Tripura, Sadar	Bamboo plantation; Bambusa polymorpha	BP	2	40cm deep	40	NBM	175.09		75690	75.69	g per m^2	Chaudhuri and Chakraboty, 2019	May 2013 to September 2015, details are unavailable.
64	non-breeding range	Inida, West Tripura, Sadar	Bamboo plantation; Melocanna baccifera	MB	2	40cm deep	40	NBM	108.68		36650	36.65	g per m^2	Chaudhuri and Chakraboty, 2019	May 2013 to September 2015, details are unavailable.
65	non-breeding range	Inida, West Tripura, Sadar	Bamboo plantation; Bambusa balcooa	BL	2	40cm deep	40	NBM	96.57		36710	36.71	g per m^2	Chaudhuri and Chakraboty, 2019	May 2013 to September 2015, details are unavailable.
66	non-breeding range	Inida, West Tripura, Sadar	Bamboo plantation; Bambusa bambos	BB	2	40cm deep	40	NBM	117.14		36660	36.66	g per m^2	Chaudhuri and Chakraboty, 2019	May 2013 to September 2015, details are unavailable.
